# Supplementary material for: Novel A–D–A structural imidazole derivatives with charge transfer excited states: importance of molecular structure design in obtaining a “turn-on” type fluorescence probe
Source: Royal Society of Chemistry journal article supplement (doi:10.1039/d2nj02013k), 2022-01-01
Supplement: d2nj02013k1.pdf [file d2nj02013k1.pdf]

**Novel A-D-A structural imidazole derivatives with charge transfer  
excited states: Importance of molecular structure design in obtaining  
a “turn-on” type fluorescence probe**

Jin Liu, Xiaolong Zheng, Yujie Dong\*, Weijun Li, Maoxing Yin,  
Qingbao Song and Cheng Zhang\*

*International Sci. & Tech. Cooperation Base of Energy Materials and Application,  
College of Chemical Engineering, Zhejiang University of Technology, Hangzhou  
310014, PR China*

*\* Corresponding author:*

Y. Dong, [dongyujie@zjut.edu.cn](mailto:dongyujie@zjut.edu.cn); C. Zhang, [czhang@zjut.edu.cn](mailto:czhang@zjut.edu.cn)

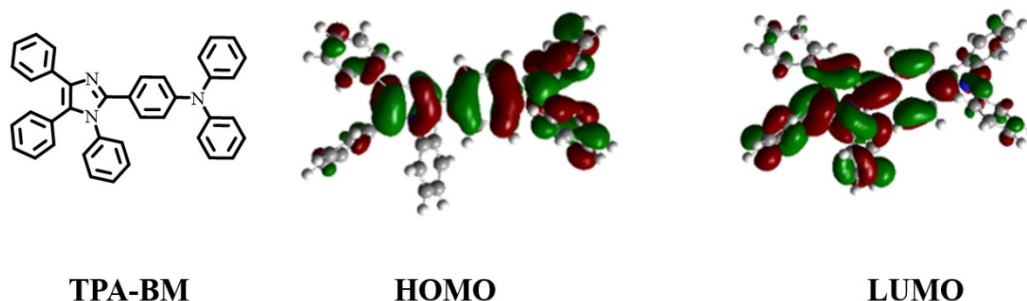

**Fig. S1** The molecular structure and the electronic density distributions of the frontier molecular orbitals (HOMO and LUMO) in the ground state of **TPA-BM**.

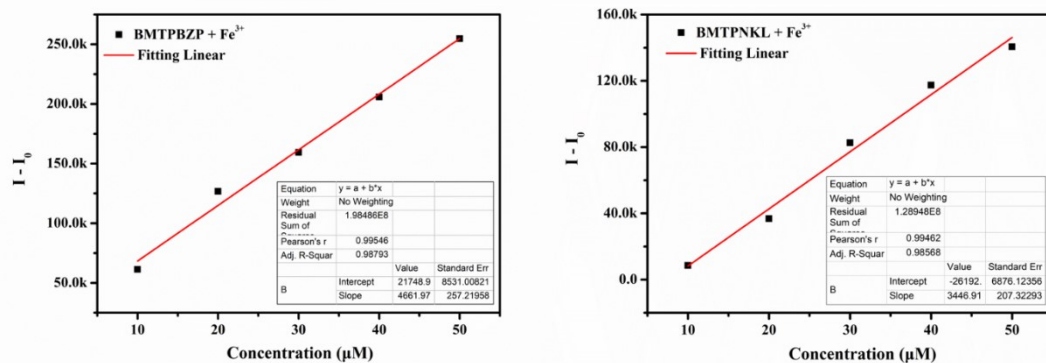

**Fig. S2** The linear intensity changes of (a) **BMTPBZP** and (b) **BMTPNKL** ( $1 \times 10^{-5}$  M) as a function of the concentration of  $\text{Fe}^{3+}$  based on their PL titration spectra.

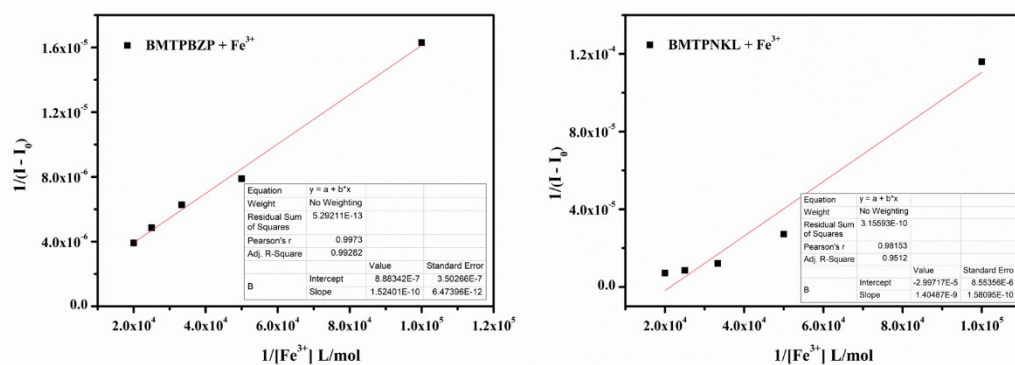

**Fig. S3** The Benesi-Hildebrand linear analysis plot of (a) **BMTPBZP** and (b) **BMTPNKL** ( $1 \times 10^{-5}$  M) at different  $\text{Fe}^{3+}$  concentrations.

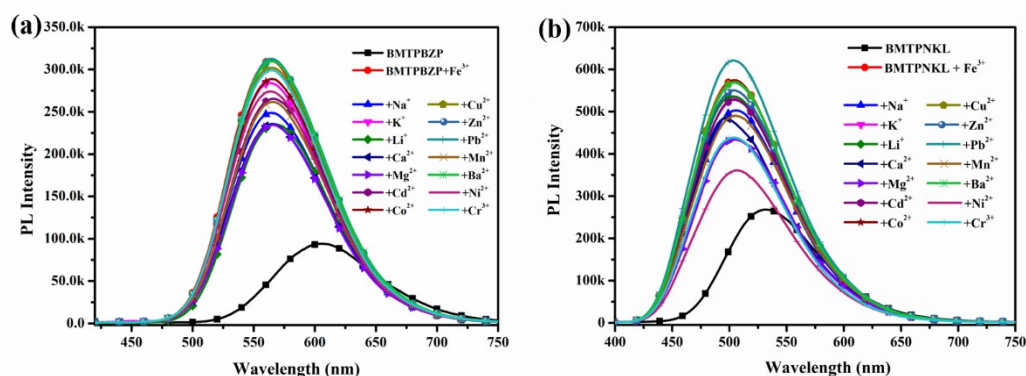

**Fig. S4** The PL spectra of (a) **BMTPBZP**+ $\text{Fe}^{3+}$  and (b) **BMTPNKL**+ $\text{Fe}^{3+}$  in the presence of various metal ions.

presence of different metal ions.

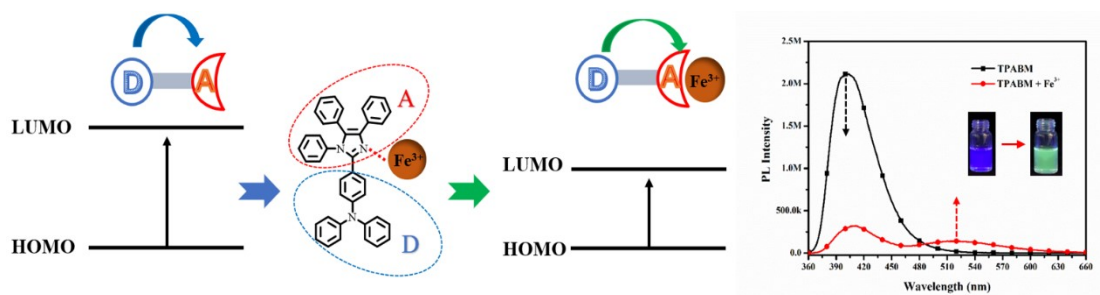

**Fig. S5** The fluorescence response of the imidazole derivative **TPA-BM** with the simple D-A structure to  $\text{Fe}^{3+}$ , which showed a completely opposite fluorescence quenching and red-shifted response, and its possible response mechanism.

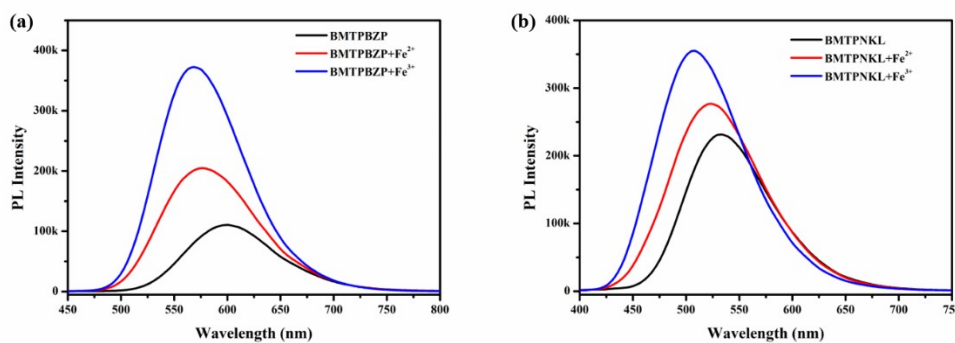

**Fig. S6** The PL spectra of (a) **BMTPBZP** and (b) **BMTPNKL** ( $1 \times 10^{-5}$  M) before and after adding  $\text{Fe}^{2+}$  and  $\text{Fe}^{3+}$ .

As shown in the above Fig. S6, the response behaviors of the probe molecules **BMTPBZP** and **BMTPNKL** to  $\text{Fe}^{2+}$  were also studied, and the results showed that both of them could also show emission enhancement and blue shift response to  $\text{Fe}^{2+}$ , but the response amplitude was relatively weaker than that of  $\text{Fe}^{3+}$ .
